# Supplementary material for: Textural, Color and Sensory Features of Spelt Wholegrain Snack Enriched with Betaine
Source: Foods. 2022 Feb 6;11(3):475. doi: 10.3390/foods11030475 (PMC8834531; doi:10.3390/foods11030475)
Supplement: Supplementary file 1 [file foods-11-00475-s001.zip › foods-1558485-supplementary.pdf]

**Table S1.** Sensory descriptors and definitions used in the sensory analysis of snack product samples.

| Descriptor              |           | Definition                                          |
|-------------------------|-----------|-----------------------------------------------------|
| Appearance              | Color     | Color on a scale from light yellow to dark brown    |
|                         |           | Before immersion in milk                            |
| Texture                 | Hardness  | The force required to crush food using incisor      |
|                         | Chewiness | The number of chewing needed to swallow food        |
| Taste                   | Sweet     | Basic taste typical of sucrose solution             |
|                         | Bitter    | Basic taste typical of caffeine or quinine solution |
| After immersion in milk |           |                                                     |
| Texture                 | Hardness  | The force required to crush food using incisor      |
|                         | Chewiness | The number of chewing needed to swallow food        |
| Taste                   | Sweet     | Basic taste typical of sucrose solution             |
|                         | Bitter    | Basic taste typical of caffeine or quinine solution |

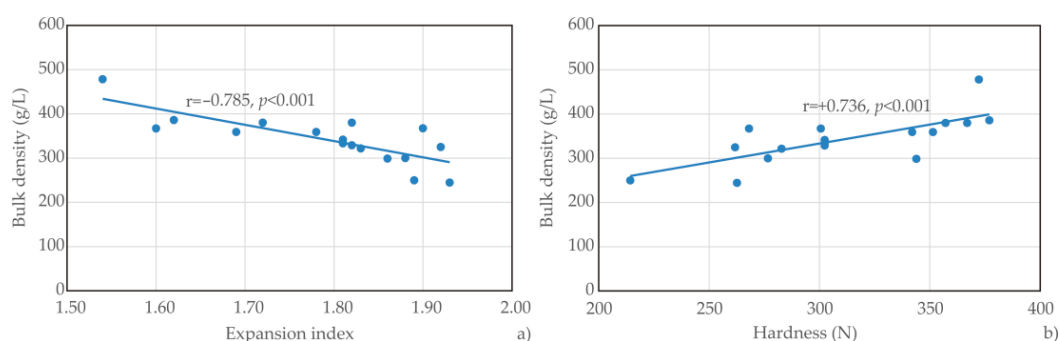

**Figure S1.** Correlation between (a) the expansion index and bulk density and between (b) hardness and bulk density.
